# Supplementary material for: The Role of Social Media in the Corporate Bond Market: Evidence from Twitter
Source: Atypon-hosted journal article supplement (doi:10.1287/mnsc.2022.4589), 2022-11-04
Supplement: mnsc.2022.4589.sm1.pdf [file mnsc.2022.4589.sm1.pdf]

# **The Role of Social Media in the Corporate Bond Market: Evidence from Twitter**

## **Online Appendix**

Eli Bartov  
Leonard N. Stern School of Business  
New York University  
[ebartov@stern.nyu.edu](mailto:ebartov@stern.nyu.edu)

Lucile Faurel  
W.P. Carey School of Business  
Arizona State University  
[lucile.faurel@asu.edu](mailto:lucile.faurel@asu.edu)

Partha Mohanram  
Rotman School of Management  
University of Toronto  
[partha.mohanram@rotman.utoronto.ca](mailto:partha.mohanram@rotman.utoronto.ca)

April 2022

**TABLE OA1**  
**Twitter Opinion, Bond Returns and Changes in CDS Spreads**  
**around Earnings Announcements – Alternative OPI Measure**

$$\begin{aligned}
 BONDRET_{[-2;+2]} \text{ or } \Delta CDSSPREAD_{[-2;+2]} = & \alpha + \beta_1 * OPI\_BAYES_{[-10;-3]} + \beta_2 * FE + \beta_3 * STOCKRET_{[-2;+2]} \\
 & + \beta_4 * STOCKRET_{[-10;-3]} + \beta_5 * RP\_OPI_{[-10;-3]} + \beta_6 * LEV + \beta_7 * ROA + \beta_8 * SIZE \\
 & + \beta_9 * MB + \beta_{10} * ANL + \beta_{11} * INST + \beta_{12} * Q4 + \beta_{13} * LOSS + \beta_{14} * HORIZON \\
 & + \beta_{15} * RATING + \beta_{16} * SPEC + \beta_{17} * SUBORD + \sum \delta_j * IND_j + \sum \delta_f * CALQTR_f + \varepsilon_{[-2;+2]}
 \end{aligned}$$

| Variable                            | <i>BONDRET</i> <sub>[-2;+2]</sub>     |                                       |                                 | <i>ΔCDSSPREAD</i> <sub>[-2;+2]</sub>    |                                         |                                  |
|-------------------------------------|---------------------------------------|---------------------------------------|---------------------------------|-----------------------------------------|-----------------------------------------|----------------------------------|
|                                     | All                                   | <i>FE</i> < 0                         | <i>FE</i> ≥ 0                   | All                                     | <i>FE</i> < 0                           | <i>FE</i> ≥ 0                    |
|                                     | I                                     | II                                    | III                             | IV                                      | V                                       | VI                               |
| <i>OPI_BAYES</i>                    | <b>0.034</b> <sup>***</sup><br>(3.33) | <b>0.076</b> <sup>***</sup><br>(3.64) | <b>0.013</b><br>(1.03)          | <b>-0.204</b> <sup>***</sup><br>(-2.89) | <b>-0.440</b> <sup>***</sup><br>(-2.65) | <b>-0.091</b><br>(-1.23)         |
| <i>FE</i>                           | 0.047<br>(1.62)                       | 0.005<br>(0.22)                       | 0.124 <sup>**</sup><br>(2.08)   | -0.424 <sup>**</sup><br>(-2.50)         | -0.043<br>(-0.27)                       | -0.784 <sup>**</sup><br>(-2.19)  |
| <i>STOCKRET</i> <sub>[-2;+2]</sub>  | 0.067 <sup>***</sup><br>(13.53)       | 0.074 <sup>***</sup><br>(9.79)        | 0.060 <sup>***</sup><br>(10.52) | -0.254 <sup>***</sup><br>(-8.80)        | -0.298 <sup>***</sup><br>(-5.78)        | -0.197 <sup>***</sup><br>(-6.06) |
| <i>STOCKRET</i> <sub>[-10;-3]</sub> | 0.016 <sup>***</sup><br>(3.22)        | 0.007<br>(0.78)                       | 0.018 <sup>***</sup><br>(3.35)  | -0.090 <sup>***</sup><br>(-2.73)        | -0.143 <sup>**</sup><br>(-2.49)         | -0.052<br>(-1.30)                |
| <i>RP_OPI</i>                       | -0.096<br>(-0.84)                     | 0.065<br>(0.29)                       | -0.121<br>(-1.02)               | -1.401 <sup>**</sup><br>(-1.97)         | -0.072<br>(-0.05)                       | -1.926 <sup>**</sup><br>(-2.36)  |
| <i>LEV</i>                          | -0.421 <sup>***</sup><br>(-2.90)      | -0.423 <sup>*</sup><br>(-1.78)        | -0.388 <sup>**</sup><br>(-2.20) | -1.176<br>(-1.09)                       | 1.134<br>(0.55)                         | -1.398<br>(-1.04)                |
| <i>ROA</i>                          | -1.644<br>(-1.24)                     | -4.754 <sup>**</sup><br>(-2.25)       | -0.330<br>(-0.18)               | 4.621<br>(0.40)                         | -8.438<br>(-0.40)                       | 17.997<br>(1.40)                 |
| <i>SIZE</i>                         | -0.050 <sup>*</sup><br>(-1.91)        | -0.015<br>(-0.33)                     | -0.040<br>(-1.38)               | -0.168<br>(-0.75)                       | -0.388<br>(-0.87)                       | -0.027<br>(-0.11)                |
| <i>MB</i>                           | 0.001<br>(0.27)                       | -0.002<br>(-0.20)                     | 0.003<br>(0.47)                 | -0.048<br>(-1.28)                       | -0.047<br>(-0.53)                       | -0.065<br>(-1.43)                |
| <i>ANL</i>                          | 0.046<br>(0.90)                       | 0.016<br>(0.15)                       | 0.099<br>(1.70)                 | 0.366<br>(1.00)                         | 0.454<br>(0.65)                         | 0.018<br>(0.04)                  |
| <i>INST</i>                         | -0.129<br>(-1.16)                     | -0.370<br>(-1.83)                     | 0.070<br>(0.53)                 | -0.600<br>(-0.47)                       | -3.974<br>(-1.63)                       | 0.610<br>(0.55)                  |
| <i>Q4</i>                           | 0.018<br>(0.28)                       | 0.184<br>(1.23)                       | -0.012<br>(-0.17)               | 0.280<br>(0.69)                         | -0.805<br>(-0.93)                       | 0.629<br>(1.24)                  |
| <i>LOSS</i>                         | 0.109 <sup>*</sup><br>(1.65)          | 0.067<br>(0.61)                       | 0.085<br>(1.03)                 | -0.875 <sup>*</sup><br>(-1.81)          | -0.194<br>(-0.20)                       | -0.723<br>(-1.30)                |
| <i>HORIZON</i>                      | 0.001<br>(0.85)                       | 0.001<br>(0.52)                       | 0.001<br>(0.72)                 | -0.001<br>(-0.10)                       | -0.001<br>(-1.38)                       | 0.001<br>(1.00)                  |
| <i>RATING</i>                       | 0.002<br>(0.15)                       | -0.035 <sup>**</sup><br>(-2.20)       | 0.019<br>(1.54)                 | -0.003<br>(-0.04)                       | 0.093<br>(0.54)                         | -0.068<br>(-0.78)                |
| <i>SPEC</i>                         | -0.150 <sup>*</sup><br>(-1.91)        | -0.064<br>(-0.44)                     | -0.168 <sup>*</sup><br>(-1.87)  | 0.694<br>(1.29)                         | -0.901<br>(-0.88)                       | 1.337 <sup>**</sup><br>(2.17)    |
| <i>SUBORD</i>                       | 0.138 <sup>**</sup><br>(1.97)         | 0.147<br>(1.11)                       | 0.106<br>(1.26)                 | -0.882 <sup>**</sup><br>(-2.16)         | -0.989<br>(-0.96)                       | -1.042 <sup>**</sup><br>(-2.23)  |
| N                                   | 6,862                                 | 2,008                                 | 4,854                           | 3,500                                   | 907                                     | 2,593                            |
| Adj. <i>R</i> <sup>2</sup> (%)      | 11.38                                 | 17.12                                 | 10.15                           | 8.98                                    | 18.13                                   | 7.79                             |

This table presents the regression results using standard errors clustered by firm. The sample consists of 7,356 firm-quarter observations (1,037 distinct firms), with earnings announcement dates between January 1, 2009 and December 31, 2012. Industry and calendar quarter fixed effects are included but not reported for brevity. Models II and V (Models III and VI) present results for the bad (good) earnings news subsample, which consists of 2,021 (4,946) firm-quarter observations, covering 696 (906) distinct firms, with earnings announcement dates between January 1, 2009 and December 31, 2012, and *FE* < 0 (*FE* ≥ 0). For the variables of interest, coefficient estimates and *t*-statistics are bolded. <sup>\*\*\*</sup>, <sup>\*\*</sup>, <sup>\*</sup> represent statistical significance at *p* < 0.01, *p* < 0.05, and *p* < 0.10 (two-tailed), respectively. See Appendix A of the paper for variable definitions. To mitigate the influence of outliers, all continuous variables are winsorized at the 1<sup>st</sup> and 99<sup>th</sup> percentiles.

**TABLE OA2**  
**Twitter Opinion and Future Changes in Bond Yield Spreads – Alternative OPI Measure**

$$\begin{aligned} \Delta YIELD_{[q-1;q+k]} = & \alpha + \beta_1 * OPI\_BAYES_{[-10;-3]} + \beta_2 * FE + \beta_3 * STOCKRET_{[-2;+2]} + \beta_4 * STOCKRET_{[-10;-3]} \\ & + \beta_5 * RP\_OPI_{[-10;-3]} + \beta_6 * LEV + \beta_7 * ROA + \beta_8 * SIZE + \beta_9 * MB + \beta_{10} * HORIZON \\ & + \beta_{11} * RATING + \beta_{12} * SPEC + \beta_{13} * SUBORD + \sum \delta_j * IND_j + \sum \delta_j * CALQTR_f + \varepsilon_{[q-1;q+k]} \end{aligned}$$

| Variable                            | <i>ΔYIELD</i>                                 |                                               |
|-------------------------------------|-----------------------------------------------|-----------------------------------------------|
|                                     | <i>[q-1;q+1]</i>                              | <i>[q-1;q+3]</i>                              |
|                                     | I                                             | II                                            |
| <i>OPI_BAYES</i>                    | <b>-0.174<sup>***</sup></b><br><b>(-6.40)</b> | <b>-0.273<sup>***</sup></b><br><b>(-7.17)</b> |
| <i>FE</i>                           | -0.209 <sup>***</sup><br>(-2.59)              | -0.022<br>(-0.22)                             |
| <i>STOCKRET</i> <sub>[-2;+2]</sub>  | -0.005<br>(-0.52)                             | 0.004<br>(0.35)                               |
| <i>STOCKRET</i> <sub>[-10;-3]</sub> | 0.015<br>(1.28)                               | -0.029*<br>(-1.87)                            |
| <i>RP_OPI</i>                       | 0.214<br>(0.92)                               | 0.134<br>(0.42)                               |
| <i>LEV</i>                          | -1.149 <sup>***</sup><br>(-2.67)              | -1.521 <sup>**</sup><br>(-2.29)               |
| <i>ROA</i>                          | 5.514<br>(1.20)                               | 9.027*<br>(1.81)                              |
| <i>SIZE</i>                         | 0.273 <sup>***</sup><br>(3.69)                | 0.446 <sup>***</sup><br>(3.81)                |
| <i>MB</i>                           | 0.035*<br>(1.68)                              | 0.081*<br>(1.69)                              |
| <i>HORIZON</i>                      | -0.001<br>(-0.09)                             | 0.001<br>(0.15)                               |
| <i>RATING</i>                       | 0.168 <sup>***</sup><br>(3.82)                | 0.307 <sup>***</sup><br>(4.19)                |
| <i>SPEC</i>                         | -0.364<br>(-1.49)                             | -0.562<br>(-1.36)                             |
| <i>SUBORD</i>                       | 0.070<br>(0.38)                               | -0.080<br>(-0.30)                             |
| N                                   | 5,402                                         | 5,228                                         |
| Adj. R <sup>2</sup> (%)             | 4.65                                          | 8.06                                          |

This table presents the regression results using standard errors clustered by firm. The sample consists of 7,356 firm-quarter observations (1,037 distinct firms), with earnings announcement dates between January 1, 2009 and December 31, 2012. Industry and calendar quarter fixed effects are included but not reported for brevity. *t*-statistics are in parentheses below coefficient estimates. For the variables of interest, coefficient estimates and *t*-statistics are bolded. <sup>\*\*\*</sup>, <sup>\*\*</sup>, <sup>\*</sup> represent statistical significance at  $p < 0.01$ ,  $p < 0.05$ , and  $p < 0.10$  (two-tailed), respectively. See Appendix A of the paper for variable definitions. To mitigate the influence of outliers, all continuous variables are winsorized at the 1<sup>st</sup> and 99<sup>th</sup> percentiles.

**TABLE OA3**  
**Twitter Opinion and Future Changes in Credit Ratings – Alternative OPI Measure**

$$\log\left(\frac{\Pr(\Delta RATING_{[-2;+t]} = -1, 1)}{\Pr(\Delta RATING_{[-2;+t]} = 0)}\right) = \alpha + \beta_1 * OPI\_BAYES_{[-10;-3]} + \beta_2 * FE + \beta_3 * STOCKRET_{[-2;+2]} + \beta_4 * STOCKRET_{[-10;-3]} + \beta_5 * RP\_OPI_{[-10;-3]} + \beta_6 * LEV + \beta_7 * ROA + \beta_8 * SIZE + \beta_9 * MB + \beta_{10} * HORIZON + \beta_{11} * RATING + \beta_{12} * SPEC + \beta_{13} * SUBORD + \sum \delta_j * IND_j + \sum \delta_j * CALQTR_f + \varepsilon_{[-2;+t]}$$

| Variable                            | [-2;+65]                    |                          | [-2;+190]                  |                          |
|-------------------------------------|-----------------------------|--------------------------|----------------------------|--------------------------|
|                                     | DOWN                        | UP                       | DOWN                       | UP                       |
|                                     | GRADE                       | GRADE                    | GRADE                      | GRADE                    |
|                                     | I                           | II                       | III                        | IV                       |
| <i>OPI_BAYES</i>                    | <b>-0.109***</b><br>(-2.59) | <b>-0.027</b><br>(-0.69) | <b>-0.086**</b><br>(-2.31) | <b>-0.013</b><br>(-0.37) |
| <i>FE</i>                           | -0.135***<br>(-2.87)        | 0.035<br>(0.64)          | -0.142***<br>(-3.32)       | 0.101**<br>(2.49)        |
| <i>STOCKRET</i> <sub>[-2;+2]</sub>  | -0.027***<br>(-2.89)        | 0.005<br>(0.58)          | -0.021***<br>(-3.18)       | 0.011**<br>(2.05)        |
| <i>STOCKRET</i> <sub>[-10;-3]</sub> | -0.009<br>(-0.77)           | -0.001<br>(-0.13)        | -0.013<br>(-1.60)          | -0.001<br>(-0.13)        |
| <i>RP_OPI</i>                       | -1.141***<br>(-3.48)        | -0.051<br>(-0.14)        | -0.613**<br>(-2.28)        | -0.091<br>(-0.34)        |
| <i>LEV</i>                          | 1.540***<br>(3.27)          | -0.063<br>(-0.13)        | 2.011***<br>(4.14)         | -0.167<br>(-0.43)        |
| <i>ROA</i>                          | -13.362***<br>(-4.55)       | 11.883**<br>(2.35)       | -14.126***<br>(-4.90)      | 8.798***<br>(2.76)       |
| <i>SIZE</i>                         | -0.480***<br>(-5.92)        | 0.033<br>(0.50)          | -0.520***<br>(-6.42)       | -0.019<br>(-0.30)        |
| <i>MB</i>                           | -0.054<br>(-1.49)           | 0.021<br>(1.16)          | -0.015<br>(-0.62)          | 0.016<br>(1.06)          |
| <i>HORIZON</i>                      | -0.001**<br>(-1.99)         | -0.001**<br>(-1.98)      | -0.001***<br>(-2.63)       | -0.001***<br>(-2.85)     |
| <i>RATING</i>                       | -0.279***<br>(-8.49)        | -0.028<br>(-1.36)        | -0.334***<br>(-10.06)      | -0.044**<br>(-2.22)      |
| <i>SPEC</i>                         | 0.963***<br>(3.33)          | 1.491***<br>(6.18)       | 1.181***<br>(4.34)         | 1.361***<br>(6.42)       |
| <i>SUBORD</i>                       | 0.482**<br>(2.55)           | 0.070<br>(0.37)          | 0.533***<br>(2.89)         | 0.199<br>(1.14)          |
| N                                   | 6,862                       |                          | 6,862                      |                          |
| N <i>DOWNGRADE</i> =1               | 321                         |                          | 699                        |                          |
| N <i>UPGRADE</i> =1                 | 274                         |                          | 707                        |                          |
| Pseudo <i>R</i> <sup>2</sup> (%)    | 12.43                       |                          | 12.75                      |                          |

This table presents the multinomial logit regression results using standard errors clustered by firm. The sample consists of 7,356 firm-quarter observations (1,037 distinct firms), with earnings announcement dates between January 1, 2009 and December 31, 2012. Industry and calendar quarter fixed effects are included but not reported for brevity. *z*-statistics are in parentheses below coefficient estimates. For the variables of interest, coefficient estimates and *z*-statistics are bolded. \*\*\*, \*\*, \* represent statistical significance at  $p < 0.01$ ,  $p < 0.05$ , and  $p < 0.10$  (two-tailed), respectively. See Appendix A of the paper for variable definitions. To mitigate the influence of outliers, all continuous variables are winsorized at the 1<sup>st</sup> and 99<sup>th</sup> percentiles.

**TABLE OA4**  
**Twitter Opinion and Future Changes in Implied Default Probability –**  
**Alternative OPI Measure**

$$\Delta PROB_{[q-1;q+k]} = \alpha + \beta_1 * OPI\_BAYES_{[-10;-3]} + \beta_2 * FE + \beta_3 * STOCKRET_{[-2;+2]} + \beta_4 * STOCKRET_{[-10;-3]} + \beta_5 * RP\_OPI_{[-10;-3]} + \beta_6 * LEV + \beta_7 * ROA + \beta_8 * SIZE + \beta_9 * MB + \beta_{10} * HORIZON + \beta_{11} * RATING + \beta_{12} * SPEC + \beta_{13} * SUBORD + \sum \delta_j * IND_j + \sum \delta_j * CALQTR_f + \varepsilon_{[q-1;q+k]}$$

| Variable                            | $\Delta Z-PROB$  |                  | $\Delta O-PROB$  |                  | $\Delta BSM-PROB$ |                  |
|-------------------------------------|------------------|------------------|------------------|------------------|-------------------|------------------|
|                                     | $[q-1;q+1]$      | $[q-1;q+3]$      | $[q-1;q+1]$      | $[q-1;q+3]$      | $[q-1;q+1]$       | $[q-1;q+3]$      |
|                                     | I                | II               | III              | IV               | V                 | VI               |
| <i>OPI_BAYES</i>                    | <b>-0.410***</b> | <b>-0.659***</b> | <b>-0.167***</b> | <b>-0.214***</b> | <b>-1.405***</b>  | <b>-2.265***</b> |
|                                     | <i>(-7.99)</i>   | <i>(-8.82)</i>   | <i>(-5.15)</i>   | <i>(-5.36)</i>   | <i>(-13.22)</i>   | <i>(-13.80)</i>  |
| <i>FE</i>                           | -0.413***        | -0.246           | -0.147           | -0.045           | -1.435***         | -0.391           |
|                                     | <i>(-2.89)</i>   | <i>(-1.59)</i>   | <i>(-0.98)</i>   | <i>(-0.30)</i>   | <i>(-3.84)</i>    | <i>(-0.79)</i>   |
| <i>STOCKRET</i> <sub>[-2;+2]</sub>  | -0.103***        | -0.106***        | -0.042***        | -0.035***        | -0.140***         | -0.162***        |
|                                     | <i>(-5.76)</i>   | <i>(-5.48)</i>   | <i>(-3.12)</i>   | <i>(-2.60)</i>   | <i>(-3.59)</i>    | <i>(-3.45)</i>   |
| <i>STOCKRET</i> <sub>[-10;-3]</sub> | -0.059**         | -0.075***        | 0.007            | -0.022           | -0.083*           | -0.136**         |
|                                     | <i>(-2.41)</i>   | <i>(-2.81)</i>   | <i>(0.38)</i>    | <i>(-1.11)</i>   | <i>(-1.77)</i>    | <i>(-2.31)</i>   |
| <i>RP_OPI</i>                       | -0.548           | 0.462            | -0.163           | 0.017            | 0.174             | 4.106***         |
|                                     | <i>(-0.92)</i>   | <i>(0.67)</i>    | <i>(-0.40)</i>   | <i>(0.04)</i>    | <i>(0.18)</i>     | <i>(3.18)</i>    |
| <i>LEV</i>                          | -1.920**         | -3.061***        | -0.954           | -0.567           | -4.356***         | -7.825***        |
|                                     | <i>(-2.54)</i>   | <i>(-2.97)</i>   | <i>(-1.25)</i>   | <i>(-0.84)</i>   | <i>(-2.85)</i>    | <i>(-3.52)</i>   |
| <i>ROA</i>                          | -27.153***       | -4.899           | -5.968           | 1.957            | 23.769*           | 64.350***        |
|                                     | <i>(-3.01)</i>   | <i>(-0.38)</i>   | <i>(-0.97)</i>   | <i>(0.34)</i>    | <i>(1.74)</i>     | <i>(3.26)</i>    |
| <i>SIZE</i>                         | 0.150            | 0.065            | 0.033            | 0.098            | 0.463**           | 1.576***         |
|                                     | <i>(1.45)</i>    | <i>(0.45)</i>    | <i>(0.36)</i>    | <i>(1.12)</i>    | <i>(2.31)</i>     | <i>(5.43)</i>    |
| <i>MB</i>                           | -0.053           | -0.012           | -0.084**         | -0.100***        | 0.005             | 0.159            |
|                                     | <i>(-1.29)</i>   | <i>(-0.24)</i>   | <i>(-2.19)</i>   | <i>(-2.82)</i>   | <i>(0.07)</i>     | <i>(1.61)</i>    |
| <i>HORIZON</i>                      | -0.001           | -0.001           | -0.001           | -0.001**         | 0.001             | 0.001            |
|                                     | <i>(-0.29)</i>   | <i>(-0.28)</i>   | <i>(-0.79)</i>   | <i>(-2.35)</i>   | <i>(0.27)</i>     | <i>(0.19)</i>    |
| <i>RATING</i>                       | 0.047            | 0.085            | 0.014            | 0.045*           | 0.094             | 0.372***         |
|                                     | <i>(1.13)</i>    | <i>(1.32)</i>    | <i>(0.51)</i>    | <i>(1.67)</i>    | <i>(1.33)</i>     | <i>(3.54)</i>    |
| <i>SPEC</i>                         | 0.058            | 0.142            | 0.095            | -0.021           | -0.757            | -0.313           |
|                                     | <i>(0.18)</i>    | <i>(0.32)</i>    | <i>(0.53)</i>    | <i>(-0.12)</i>   | <i>(-1.26)</i>    | <i>(-0.32)</i>   |
| <i>SUBORD</i>                       | -0.181           | -0.192           | -0.068           | -0.188           | -1.018*           | -1.443           |
|                                     | <i>(-0.59)</i>   | <i>(-0.41)</i>   | <i>(-0.33)</i>   | <i>(-0.72)</i>   | <i>(-1.82)</i>    | <i>(-1.53)</i>   |
| N                                   | 6,227            | 6,107            | 5,368            | 5,276            | 6,755             | 6,749            |
| Adj. R <sup>2</sup> (%)             | 6.40             | 7.48             | 3.40             | 2.98             | 8.48              | 10.95            |

This table presents the regression results using standard errors clustered by firm. Changes in implied default probability (in %) are estimated based on changes in Z-Score (*Z-PROB*), O-Score (*O-PROB*), and the Black-Scholes-Merton model (*BSM-PROB*) between quarter *q-1* and either quarter *q+1* or quarter *q+3*, where quarter *q* is the quarter during which *OPI* is measured. The sample consists of 7,356 firm-quarter observations (1,037 distinct firms), with quarterly earnings announcement dates between January 1, 2009 and December 31, 2012. Industry and calendar quarter fixed effects are included but not reported for brevity. *t*-statistics are in parentheses below coefficient estimates. For the variables of interest, coefficient estimates and *t*-statistics are bolded. \*\*\*, \*\*, \* represent statistical significance at  $p < 0.01$ ,  $p < 0.05$ , and  $p < 0.10$  (two-tailed), respectively. See Appendix A of the paper for variable definitions. To mitigate the influence of outliers, all continuous variables are winsorized at the 1<sup>st</sup> and 99<sup>th</sup> percentiles.

**TABLE OA5**  
**Twitter Opinion, Bond Returns and Changes in CDS Spreads around Earnings Announcements – Original and Dissemination Tweets**

$$\begin{aligned}
 BONDRET_{[-2;+2]} \text{ or } \Delta CDSSPREAD_{[-2;+2]} = & \alpha + \beta_1 * OPI_{[-10;-3]} + \beta_2 * FE + \beta_3 * STOCKRET_{[-2;+2]} \\
 & + \beta_4 * STOCKRET_{[-10;-3]} + \beta_5 * RP\_OPI_{[-10;-3]} + \beta_6 * LEV + \beta_7 * ROA + \beta_8 * SIZE \\
 & + \beta_9 * MB + \beta_{10} * ANL + \beta_{11} * INST + \beta_{12} * Q4 + \beta_{13} * LOSS + \beta_{14} * HORIZON \\
 & + \beta_{15} * RATING + \beta_{16} * SPEC + \beta_{17} * SUBORD + \sum \delta_j * IND_j + \sum \delta_j * CALQTR_f + \varepsilon_{[-2;+2]}
 \end{aligned}$$

| Variable                            | $BONDRET_{[-2;+2]}$      |                          | $\Delta CDSSPREAD_{[-2;+2]}$ |                             |
|-------------------------------------|--------------------------|--------------------------|------------------------------|-----------------------------|
|                                     | <i>ORIG</i>              | <i>DISSEM</i>            | <i>ORIG</i>                  | <i>DISSEM</i>               |
|                                     | I                        | II                       | III                          | IV                          |
| <i>OPI</i>                          | <b>0.053**</b><br>(2.53) | <b>0.037**</b><br>(2.24) | <b>-0.257*</b><br>(-1.86)    | <b>-0.348***</b><br>(-2.99) |
| <i>FE</i>                           | 0.035<br>(1.30)          | 0.075**<br>(2.40)        | -0.239*<br>(-1.72)           | -0.374*<br>(-1.90)          |
| <i>STOCKRET</i> <sub>[-2;+2]</sub>  | 0.065***<br>(10.86)      | 0.067***<br>(12.96)      | -0.272***<br>(-8.58)         | -0.260***<br>(-8.70)        |
| <i>STOCKRET</i> <sub>[-10;-3]</sub> | 0.012**<br>(2.22)        | 0.016***<br>(3.41)       | -0.091**<br>(-2.50)          | -0.082**<br>(-2.36)         |
| <i>RP_OPI</i>                       | -0.025<br>(-0.18)        | -0.068<br>(-0.62)        | -2.045**<br>(-2.41)          | -1.298*<br>(-1.81)          |
| <i>LEV</i>                          | -0.327*<br>(-1.84)       | -0.474***<br>(-3.25)     | -0.750<br>(-0.58)            | -1.490<br>(-1.46)           |
| <i>ROA</i>                          | -1.070<br>(-0.74)        | -1.496<br>(-1.00)        | 6.792<br>(0.51)              | -3.434<br>(-0.34)           |
| <i>SIZE</i>                         | -0.061*<br>(-1.83)       | -0.029<br>(-1.14)        | -0.071<br>(-0.28)            | -0.375*<br>(-1.68)          |
| <i>MB</i>                           | 0.000<br>(-0.03)         | 0.005<br>(0.94)          | -0.060<br>(-1.28)            | -0.057<br>(-1.49)           |
| <i>ANL</i>                          | -0.027<br>(-0.40)        | 0.047<br>(0.93)          | 1.023**<br>(2.51)            | 0.538<br>(1.48)             |
| <i>INST</i>                         | -0.211<br>(-1.49)        | -0.083<br>(-0.74)        | 0.586<br>(0.39)              | -0.723<br>(-0.55)           |
| <i>Q4</i>                           | 0.062<br>(0.82)          | 0.039<br>(0.58)          | 0.087<br>(0.16)              | 0.351<br>(0.88)             |
| <i>LOSS</i>                         | 0.218***<br>(2.70)       | 0.081<br>(1.16)          | -0.551<br>(-1.01)            | -0.616<br>(-1.18)           |
| <i>HORIZON</i>                      | 0.001<br>(0.33)          | 0.001<br>(0.12)          | 0.001<br>(0.05)              | -0.001<br>(-0.21)           |
| <i>RATING</i>                       | -0.007<br>(-0.53)        | 0.008<br>(0.73)          | 0.050<br>(0.63)              | -0.060<br>(-0.74)           |
| <i>SPEC</i>                         | -0.176<br>(-1.79)        | -0.195**<br>(-2.44)      | 0.789<br>(1.32)              | 0.825<br>(1.56)             |
| <i>SUBORD</i>                       | 0.213**<br>(2.33)        | 0.151**<br>(2.10)        | -1.530***<br>(-2.94)         | -0.830**<br>(-2.09)         |
| N                                   | 4,550                    | 6,402                    | 2,467                        | 3,273                       |
| Adj. R <sup>2</sup> (%)             | 11.57                    | 11.91                    | 10.66                        | 8.88                        |

This table presents the regression results using standard errors clustered by firm. The sample consists of 7,356 firm-quarter observations (1,037 distinct firms), with earnings announcement dates between January 1, 2009 and December 31, 2012. Industry and calendar quarter fixed effects are included but not reported for brevity. Models I and III (Models II and IV) present results for original (dissemination) tweets. *t*-statistics are in parentheses below coefficient estimates. For the variables of interest, coefficient estimates and *t*-statistics are bolded. \*\*\*, \*\*, \* represent statistical significance at  $p < 0.01$ ,  $p < 0.05$ , and  $p < 0.10$  (two-tailed), respectively. See Appendix A of the paper for variable definitions. To mitigate the influence of outliers, all continuous variables are winsorized at the 1<sup>st</sup> and 99<sup>th</sup> percentiles.

**TABLE OA6**  
**Twitter Opinion and Future Changes in Bond Yield Spreads –**  
**Original and Dissemination Tweets**

$$\begin{aligned} \Delta YIELD_{[q-1;q+1]} = & \alpha + \beta_1 * OPI_{[-10;-3]} + \beta_2 * FE + \beta_3 * STOCKRET_{[-2;+2]} + \beta_4 * STOCKRET_{[-10;-3]} \\ & + \beta_5 * RP\_OPI_{[-10;-3]} + \beta_6 * LEV + \beta_7 * ROA + \beta_8 * SIZE + \beta_9 * MB + \beta_{10} * HORIZON \\ & + \beta_{11} * RATING + \beta_{12} * SPEC + \beta_{13} * SUBORD + \sum \delta_j * IND_j + \sum \delta_f * CALQTR_f + \varepsilon_{[q-1;q+1]} \end{aligned}$$

| Variable                            | $\Delta YIELD_{[q-1;q+1]}$                    |                                               |
|-------------------------------------|-----------------------------------------------|-----------------------------------------------|
|                                     | <i>ORIG</i>                                   | <i>DISSEM</i>                                 |
|                                     | I                                             | II                                            |
| <i>OPI</i>                          | <b>-0.181<sup>***</sup></b><br><b>(-3.09)</b> | <b>-0.118<sup>***</sup></b><br><b>(-2.58)</b> |
| <i>FE</i>                           | -0.180 <sup>**</sup><br><b>(-2.15)</b>        | -0.244 <sup>***</sup><br><b>(-3.17)</b>       |
| <i>STOCKRET</i> <sub>[-2;+2]</sub>  | -0.015<br><b>(-1.34)</b>                      | 0.006<br><b>(0.69)</b>                        |
| <i>STOCKRET</i> <sub>[-10;-3]</sub> | 0.017<br><b>(1.26)</b>                        | 0.019<br><b>(1.64)</b>                        |
| <i>RP_OPI</i>                       | 0.230<br><b>(0.78)</b>                        | 0.274<br><b>(1.29)</b>                        |
| <i>LEV</i>                          | -1.300 <sup>**</sup><br><b>(-2.45)</b>        | -1.164 <sup>***</sup><br><b>(-2.90)</b>       |
| <i>ROA</i>                          | 3.562<br><b>(0.69)</b>                        | 8.623 <sup>*</sup><br><b>(1.94)</b>           |
| <i>SIZE</i>                         | 0.339 <sup>***</sup><br><b>(3.81)</b>         | 0.214 <sup>***</sup><br><b>(2.88)</b>         |
| <i>MB</i>                           | 0.037<br><b>(1.43)</b>                        | 0.035 <sup>*</sup><br><b>(1.70)</b>           |
| <i>HORIZON</i>                      | -0.001<br><b>(-0.16)</b>                      | -0.001<br><b>(-0.15)</b>                      |
| <i>RATING</i>                       | 0.165 <sup>***</sup><br><b>(3.24)</b>         | 0.166 <sup>***</sup><br><b>(3.72)</b>         |
| <i>SPEC</i>                         | -0.177<br><b>(-0.58)</b>                      | -0.261<br><b>(-1.10)</b>                      |
| <i>SUBORD</i>                       | 0.137<br><b>(0.57)</b>                        | -0.026<br><b>(-0.14)</b>                      |
| N                                   | 3,724                                         | 5,068                                         |
| Adj. R <sup>2</sup> (%)             | 4.80                                          | 4.70                                          |

This table presents the regression results using standard errors clustered by firm. The sample consists of 7,356 firm-quarter observations (1,037 distinct firms), with earnings announcement dates between January 1, 2009 and December 31, 2012. Industry and calendar quarter fixed effects are included but not reported for brevity. Models I (Model II) presents results for original (dissemination) tweets. *t*-statistics are in parentheses below coefficient estimates. For the variables of interest, coefficient estimates and *t*-statistics are bolded. <sup>\*\*\*</sup>, <sup>\*\*</sup>, <sup>\*</sup> represent statistical significance at  $p < 0.01$ ,  $p < 0.05$ , and  $p < 0.10$  (two-tailed), respectively. See Appendix A of the paper for variable definitions. To mitigate the influence of outliers, all continuous variables are winsorized at the 1<sup>st</sup> and 99<sup>th</sup> percentiles.

**TABLE OA7**  
**Twitter Opinion and Future Changes in Credit Ratings –**  
**Original and Dissemination Tweets**

$$\log \left( \frac{\Pr(\Delta RATING_{[-2;+65]} = -1, 1)}{\Pr(\Delta RATING_{[-2;+65]} = 0)} \right) = \alpha + \beta_1 * OPI_{[-10;-3]} + \beta_2 * FE + \beta_3 * STOCKRET_{[-2;+2]} + \beta_4 * STOCKRET_{[-10;-3]} \\ + \beta_5 * RP\_OPI_{[-10;-3]} + \beta_6 * LEV + \beta_7 * ROA + \beta_8 * SIZE + \beta_9 * MB + \beta_{10} * HORIZON \\ + \beta_{11} * RATING + \beta_{12} * SPEC + \beta_{13} * SUBORD + \sum \delta_j * IND_j + \sum \delta_f * CALQTR_f + \varepsilon_{[-2;+65]}$$

| Variable                            | ORIG                        |                          | DISSEM                      |                          |
|-------------------------------------|-----------------------------|--------------------------|-----------------------------|--------------------------|
|                                     | DOWN                        | UP                       | DOWN                        | UP                       |
|                                     | GRADE                       | GRADE                    | GRADE                       | GRADE                    |
|                                     | I                           | II                       | III                         | IV                       |
| <i>OPI</i>                          | <b>-0.278***</b><br>(-3.90) | <b>-0.096</b><br>(-1.15) | <b>-0.262***</b><br>(-3.95) | <b>-0.050</b><br>(-0.75) |
| <i>FE</i>                           | -0.097***<br>(-2.98)        | 0.028<br>(0.49)          | -0.166***<br>(-2.91)        | 0.048<br>(0.76)          |
| <i>STOCKRET</i> <sub>[-2;+2]</sub>  | -0.028**<br>(-2.57)         | -0.001<br>(-0.08)        | -0.029***<br>(-2.84)        | 0.005<br>(0.60)          |
| <i>STOCKRET</i> <sub>[-10;-3]</sub> | 0.002<br>(0.16)             | 0.005<br>(0.42)          | -0.003<br>(-0.21)           | 0.002<br>(0.20)          |
| <i>RP_OPI</i>                       | -0.998***<br>(-2.71)        | 0.286<br>(0.69)          | -0.862***<br>(-2.60)        | 0.025<br>(0.07)          |
| <i>LEV</i>                          | 1.665***<br>(3.23)          | 0.097<br>(0.19)          | 1.514***<br>(3.12)          | -0.043<br>(-0.09)        |
| <i>ROA</i>                          | -8.750***<br>(-2.78)        | 9.503*<br>(1.69)         | -17.663***<br>(-5.37)       | 8.954*<br>(1.84)         |
| <i>SIZE</i>                         | -0.566***<br>(-6.73)        | 0.020<br>(0.25)          | -0.449***<br>(-5.54)        | 0.052<br>(0.78)          |
| <i>MB</i>                           | -0.056<br>(-1.43)           | 0.016<br>(0.80)          | -0.046<br>(-1.39)           | 0.022<br>(1.25)          |
| <i>HORIZON</i>                      | -0.001**<br>(-1.98)         | -0.001**<br>(-2.11)      | -0.001<br>(-1.59)           | -0.001*<br>(-1.94)       |
| <i>RATING</i>                       | -0.286***<br>(-7.39)        | -0.033<br>(-1.29)        | -0.282***<br>(-8.31)        | -0.026<br>(-1.19)        |
| <i>SPEC</i>                         | 1.000***<br>(3.41)          | 1.404***<br>(4.42)       | 1.070***<br>(3.54)          | 1.520***<br>(6.23)       |
| <i>SUBORD</i>                       | 0.556**<br>(2.46)           | 0.164<br>(0.76)          | 0.606***<br>(3.07)          | 0.077<br>(0.39)          |
| N                                   | 4,550                       |                          | 6,402                       |                          |
| N <i>DOWNGRADE</i> =1               | 245                         |                          | 281                         |                          |
| N <i>UPGRADE</i> =1                 | 181                         |                          | 260                         |                          |
| Pseudo <i>R</i> <sup>2</sup> (%)    | 14.57                       |                          | 12.60                       |                          |

This table presents the multinomial logit regression results using standard errors clustered by firm. The sample consists of 7,356 firm-quarter observations (1,037 distinct firms), with earnings announcement dates between January 1, 2009 and December 31, 2012. Industry and calendar quarter fixed effects are included but not reported for brevity. Models I and III (Models II and IV) present results for original (dissemination) tweets. *z*-statistics are in parentheses below coefficient estimates. For the variables of interest, coefficient estimates and *z*-statistics are bolded. \*\*\*, \*\*, \* represent statistical significance at  $p < 0.01$ ,  $p < 0.05$ , and  $p < 0.10$  (two-tailed), respectively. See Appendix A of the paper for variable definitions. To mitigate the influence of outliers, all continuous variables are winsorized at the 1<sup>st</sup> and 99<sup>th</sup> percentiles.

**TABLE OA8**  
**Twitter Opinion and Future Changes in Implied Default Probability –**  
**Original and Dissemination Tweets**

$$\begin{aligned} \Delta PROB_{[q-1;q+1]} = & \alpha + \beta_1 * OPI_{[-10;-3]} + \beta_2 * FE + \beta_3 * STOCKRET_{[-2;+2]} + \beta_4 * STOCKRET_{[-10;-3]} \\ & + \beta_5 * RP\_OPI_{[-10;-3]} + \beta_6 * LEV + \beta_7 * ROA + \beta_8 * SIZE + \beta_9 * MB + \beta_{10} * HORIZON \\ & + \beta_{11} * RATING + \beta_{12} * SPEC + \beta_{13} * SUBORD + \sum \delta_j * IND_j + \sum \delta_f * CALQTR_f + \varepsilon_{[q-1;q+1]} \end{aligned}$$

| Variable                            | $\Delta Z-PROB$             |                             | $\Delta O-PROB$             |                             | $\Delta BSM-PROB$           |                             |
|-------------------------------------|-----------------------------|-----------------------------|-----------------------------|-----------------------------|-----------------------------|-----------------------------|
|                                     | <i>ORIG</i>                 | <i>DISSEM</i>               | <i>ORIG</i>                 | <i>DISSEM</i>               | <i>ORIG</i>                 | <i>DISSEM</i>               |
|                                     | I                           | II                          | III                         | IV                          | V                           | VI                          |
| <i>OPI</i>                          | <b>-0.576***</b><br>(-5.10) | <b>-0.507***</b><br>(-5.89) | <b>-0.269***</b><br>(-3.09) | <b>-0.126***</b><br>(-2.04) | <b>-2.053***</b><br>(-9.45) | <b>-1.603***</b><br>(-8.70) |
| <i>FE</i>                           | -0.268*<br>(-1.81)          | -0.440***<br>(-2.86)        | -0.059<br>(-0.33)           | -0.181<br>(-1.07)           | -1.296***<br>(-4.19)        | -1.503***<br>(-3.66)        |
| <i>STOCKRET</i> <sub>[-2;+2]</sub>  | -0.109***<br>(-4.57)        | -0.086***<br>(-4.61)        | -0.037*<br>(-1.92)          | -0.036**<br>(-2.54)         | -0.163***<br>(-3.08)        | -0.121***<br>(-3.30)        |
| <i>STOCKRET</i> <sub>[-10;-3]</sub> | -0.069**<br>(-2.29)         | -0.037<br>(-1.49)           | 0.010<br>(0.39)             | 0.020<br>(1.07)             | -0.071<br>(-1.29)           | -0.026<br>(-0.56)           |
| <i>RP_OPI</i>                       | 0.004<br>(0.01)             | -0.687<br>(-1.11)           | -0.006<br>(-0.01)           | -0.282<br>(-0.67)           | -0.318<br>(-0.27)           | 0.803<br>(0.86)             |
| <i>LEV</i>                          | -2.393**<br>(-2.21)         | -1.648**<br>(-2.32)         | -1.291<br>(-1.10)           | -0.629<br>(-0.80)           | -4.525**<br>(-2.40)         | -4.072***<br>(-2.76)        |
| <i>ROA</i>                          | -38.492***<br>(-3.66)       | -24.499***<br>(-2.70)       | -9.084<br>(-1.20)           | -4.173<br>(-0.68)           | 12.825<br>(0.80)            | 23.080*<br>(1.73)           |
| <i>SIZE</i>                         | 0.376**<br>(2.47)           | -0.049<br>(-0.47)           | 0.226<br>(1.50)             | -0.074<br>(-0.77)           | 0.517*<br>(1.77)            | 0.139<br>(0.69)             |
| <i>MB</i>                           | -0.055<br>(-0.98)           | -0.051<br>(-1.29)           | -0.110**<br>(-2.00)         | -0.084**<br>(-2.17)         | -0.041<br>(-0.40)           | -0.003<br>(-0.04)           |
| <i>HORIZON</i>                      | 0.001<br>(0.89)             | -0.001<br>(-0.04)           | 0.001<br>(0.28)             | -0.001<br>(-1.19)           | 0.001<br>(0.08)             | 0.001<br>(1.58)             |
| <i>RATING</i>                       | 0.068<br>(1.18)             | 0.027<br>(0.65)             | 0.018<br>(0.43)             | 0.006<br>(0.23)             | 0.143<br>(1.52)             | 0.081<br>(1.18)             |
| <i>SPEC</i>                         | 0.161<br>(0.36)             | 0.165<br>(0.54)             | 0.325<br>(1.14)             | 0.048<br>(0.27)             | -1.574<br>(-1.95)           | -0.290<br>(-0.53)           |
| <i>SUBORD</i>                       | -0.426<br>(-0.97)           | -0.167<br>(-0.58)           | -0.106<br>(-0.32)           | -0.017<br>(-0.09)           | -1.144<br>(-1.50)           | -1.054*<br>(-1.88)          |
| N                                   | 4,135                       | 5,806                       | 3,636                       | 4,997                       | 4,483                       | 6,301                       |
| Adj. <i>R</i> <sup>2</sup> (%)      | 6.77                        | 5.69                        | 3.34                        | 2.98                        | 8.80                        | 6.91                        |

This table presents the regression results using standard errors clustered by firm. Changes in implied default probability (in %) are estimated based on changes in Z-Score (*Z-PROB*), O-Score (*O-PROB*), and the Black-Scholes-Merton model (*BSM-PROB*) between quarter *q*-1 and quarter *q*+1, where quarter *q* is the quarter during which *OPI* is measured. The sample consists of 7,356 firm-quarter observations (1,037 distinct firms), with quarterly earnings announcement dates between January 1, 2009 and December 31, 2012. Industry and calendar quarter fixed effects are included but not reported for brevity. Models I, III, and V (Models II, IV, and VI) present results for original (dissemination) tweets. *t*-statistics are in parentheses below coefficient estimates. For the variables of interest, coefficient estimates and *t*-statistics are bolded. \*\*\*, \*\*, \* represent statistical significance at  $p < 0.01$ ,  $p < 0.05$ , and  $p < 0.10$  (two-tailed), respectively. See Appendix A of the paper for variable definitions. To mitigate the influence of outliers, all continuous variables are winsorized at the 1<sup>st</sup> and 99<sup>th</sup> percentiles.

**TABLE OA9**  
**Twitter Opinion, Bond Returns and Changes in CDS Spreads around Earnings Announcements – by Twitter Activity**

$$\begin{aligned}
 BONDRET_{[-2;+2]} \text{ or } \Delta CDSSPREAD_{[-2;+2]} = & \alpha + \beta_1 * OPI_{[-10;-3]} + \beta_2 * FE + \beta_3 * STOCKRET_{[-2;+2]} \\
 & + \beta_4 * STOCKRET_{[-10;-3]} + \beta_5 * RP\_OPI_{[-10;-3]} + \beta_6 * LEV + \beta_7 * ROA + \beta_8 * SIZE \\
 & + \beta_9 * MB + \beta_{10} * ANL + \beta_{11} * INST + \beta_{12} * Q4 + \beta_{13} * LOSS + \beta_{14} * HORIZON \\
 & + \beta_{15} * RATING + \beta_{16} * SPEC + \beta_{17} * SUBORD + \sum \delta_j * IND_j + \sum \delta_f * CALQTR_f + \varepsilon_{[-2;+2]}
 \end{aligned}$$

| Variable       | $BONDRET_{[-2;+2]}$       |                        |                        | $\Delta CDSSPREAD_{[-2;+2]}$ |                            |                          |
|----------------|---------------------------|------------------------|------------------------|------------------------------|----------------------------|--------------------------|
|                | <i>High Activity</i>      | <i>Low Activity</i>    | <i>Diff</i>            | <i>High Activity</i>         | <i>Low Activity</i>        | <i>Diff</i>              |
|                | I                         | II                     |                        | III                          | IV                         |                          |
| <i>OPI</i>     | <b>0.068***</b><br>(2.99) | <b>0.042</b><br>(1.41) | <b>0.026</b><br>(0.70) | <b>-0.536***</b><br>(-3.54)  | <b>-0.473**</b><br>(-2.28) | <b>-0.064</b><br>(-0.25) |
| N              | 3,452                     | 3,410                  |                        | 2,089                        | 1,411                      |                          |
| Adj. $R^2$ (%) | 15.16                     | 10.27                  |                        | 10.66                        | 10.29                      |                          |

This table presents the regression results using standard errors clustered by firm. The sample consists of 7,356 firm-quarter observations (1,037 distinct firms), with earnings announcement dates between January 1, 2009 and December 31, 2012. Industry and calendar quarter fixed effects as well as control variables are included but not reported for brevity. Models I and III (Models II and IV) present results for high (low) Twitter activity. The high (low) Twitter activity subsample consists of 3,685 (3,671) firm-quarter observations, covering 685 (928) distinct firms, with earnings announcement dates between January 1, 2009 and December 31, 2012, and observations above (below) sample median number of tweets for each calendar quarter.  $t$ -statistics are in parentheses below coefficient estimates. For the variables of interest, coefficient estimates and  $t$ -statistics are bolded. \*\*\*, \*\*, \* represent statistical significance at  $p < 0.01$ ,  $p < 0.05$ , and  $p < 0.10$  (two-tailed), respectively. See Appendix A of the paper for variable definitions. To mitigate the influence of outliers, all continuous variables are winsorized at the 1<sup>st</sup> and 99<sup>th</sup> percentiles.

**TABLE OA10**  
**Twitter Opinion and Future Changes in Bond Yield Spreads – by Twitter Activity**

$$\begin{aligned}
 \Delta YIELD_{[q-1;q+1]} = & \alpha + \beta_1 * OPI_{[-10;-3]} + \beta_2 * FE + \beta_3 * STOCKRET_{[-2;+2]} + \beta_4 * STOCKRET_{[-10;-3]} \\
 & + \beta_5 * RP\_OPI_{[-10;-3]} + \beta_6 * LEV + \beta_7 * ROA + \beta_8 * SIZE + \beta_9 * MB + \beta_{10} * HORIZON \\
 & + \beta_{11} * RATING + \beta_{12} * SPEC + \beta_{13} * SUBORD + \sum \delta_j * IND_j + \sum \delta_f * CALQTR_f + \varepsilon_{[q-1;q+1]}
 \end{aligned}$$

| Variable       | $\Delta YIELD_{[q-1;q+1]}$  |                          |                          |
|----------------|-----------------------------|--------------------------|--------------------------|
|                | <i>High Activity</i>        | <i>Low Activity</i>      | <i>Diff</i>              |
|                | I                           | II                       |                          |
| <i>OPI</i>     | <b>-0.261***</b><br>(-4.32) | <b>-0.115</b><br>(-1.04) | <b>-0.146</b><br>(-1.16) |
| N              | 2,985                       | 2,417                    |                          |
| Adj. $R^2$ (%) | 6.04                        | 7.17                     |                          |

This table presents the regression results using standard errors clustered by firm. The sample consists of 7,356 firm-quarter observations (1,037 distinct firms), with earnings announcement dates between January 1, 2009 and December 31, 2012. Industry and calendar quarter fixed effects as well as control variables are included but not reported for brevity. Models I (Model II) presents results for high (low) Twitter activity. The high (low) Twitter activity subsample consists of 3,685 (3,671) firm-quarter observations, covering 685 (928) distinct firms, with earnings announcement dates between January 1, 2009 and December 31, 2012, and observations above (below) sample median number of tweets for each calendar quarter.  $t$ -statistics are in parentheses below coefficient estimates. For the variables of interest, coefficient estimates and  $t$ -statistics are bolded. \*\*\*, \*\*, \* represent statistical significance at  $p < 0.01$ ,  $p < 0.05$ , and  $p < 0.10$  (two-tailed), respectively. See Appendix A of the paper for variable definitions. To mitigate the influence of outliers, all continuous variables are winsorized at the 1<sup>st</sup> and 99<sup>th</sup> percentiles.

**TABLE OA11**  
**Twitter Opinion and Future Changes in Credit Ratings – by Twitter Activity**

$$\log\left(\frac{\Pr(\Delta RATING_{[-2;+65]} = -1, 1)}{\Pr(\Delta RATING_{[-2;+65]} = 0)}\right) = \alpha + \beta_1 * OPI_{[-10;-3]} + \beta_2 * FE + \beta_3 * STOCKRET_{[-2;+2]} + \beta_4 * STOCKRET_{[-10;-3]} + \beta_5 * RP\_OPI_{[-10;-3]} + \beta_6 * LEV + \beta_7 * ROA + \beta_8 * SIZE + \beta_9 * MB + \beta_{10} * HORIZON + \beta_{11} * RATING + \beta_{12} * SPEC + \beta_{13} * SUBORD + \Sigma \delta_j * IND_j + \Sigma \delta_f * CALQTR_f + \varepsilon_{[-2;+65]}$$

| Variable                  | DOWNGRADE <sub>[-2;+65]</sub>      |                                 |                                 | UPGRADE <sub>[-2;+65]</sub>     |                                 |                                 |
|---------------------------|------------------------------------|---------------------------------|---------------------------------|---------------------------------|---------------------------------|---------------------------------|
|                           | High Activity                      | Low Activity                    | Diff                            | High Activity                   | Low Activity                    | Diff                            |
|                           | I                                  | II                              |                                 | III                             | IV                              |                                 |
| <i>OPI</i>                | <b>-0.250***</b><br><b>(-3.46)</b> | <b>-0.038</b><br><b>(-0.34)</b> | <b>-0.212</b><br><b>(-1.61)</b> | <b>-0.080</b><br><b>(-0.78)</b> | <b>-0.061</b><br><b>(-0.61)</b> | <b>-0.020</b><br><b>(-0.14)</b> |
| N                         | 3,452                              | 3,410                           |                                 | 3,452                           | 3,410                           |                                 |
| N DOWNGRADE=1             | 178                                | 143                             |                                 | 178                             | 143                             |                                 |
| N UPGRADE=1               | 124                                | 150                             |                                 | 124                             | 150                             |                                 |
| Pseudo R <sup>2</sup> (%) | 11.08                              | 18.55                           |                                 | 9.72                            | 10.56                           |                                 |

This table presents the separate logit regression results using standard errors clustered by firm. The sample consists of 7,356 firm-quarter observations (1,037 distinct firms), with earnings announcement dates between January 1, 2009 and December 31, 2012. Industry and calendar quarter fixed effects as well as control variables are included but not reported for brevity. Models I and III (Models II and IV) present results for high (low) Twitter activity. The high (low) Twitter activity subsample consists of 3,685 (3,671) firm-quarter observations, covering 685 (928) distinct firms, with earnings announcement dates between January 1, 2009 and December 31, 2012, and observations above (below) sample median number of tweets for each calendar quarter. z-statistics are in parentheses below coefficient estimates. For the variables of interest, coefficient estimates and z-statistics are bolded. \*\*\*, \*\*, \* represent statistical significance at  $p < 0.01$ ,  $p < 0.05$ , and  $p < 0.10$  (two-tailed), respectively. See Appendix A of the paper for variable definitions. To mitigate the influence of outliers, all continuous variables are winsorized at the 1<sup>st</sup> and 99<sup>th</sup> percentiles.

**TABLE OA12**  
**Twitter Opinion and Future Changes in Implied Default Probability – by Twitter Activity**

$$\Delta PROB_{[q-1;q+1]} = \alpha + \beta_1 * OPI_{[-10;-3]} + \beta_2 * FE + \beta_3 * STOCKRET_{[-2;+2]} + \beta_4 * STOCKRET_{[-10;-3]} + \beta_5 * RP\_OPI_{[-10;-3]} + \beta_6 * LEV + \beta_7 * ROA + \beta_8 * SIZE + \beta_9 * MB + \beta_{10} * HORIZON + \beta_{11} * RATING + \beta_{12} * SPEC + \beta_{13} * SUBORD + \Sigma \delta_j * IND_j + \Sigma \delta_f * CALQTR_f + \varepsilon_{[q-1;q+1]}$$

| Variable                | $\Delta Z-PROB_{[q-1;q+1]}$        |                                    |                               | $\Delta O-PROB_{[q-1;q+1]}$      |                                   |                               | $\Delta BSM-PROB_{[q-1;q+1]}$      |                                    |                                 |
|-------------------------|------------------------------------|------------------------------------|-------------------------------|----------------------------------|-----------------------------------|-------------------------------|------------------------------------|------------------------------------|---------------------------------|
|                         | High Activity                      | Low Activity                       | Diff                          | High Activity                    | Low Activity                      | Diff                          | High Activity                      | Low Activity                       | Diff                            |
|                         | I                                  | II                                 |                               | III                              | IV                                |                               | V                                  | VI                                 |                                 |
| <i>OPI</i>              | <b>-0.506***</b><br><b>(-4.06)</b> | <b>-0.632***</b><br><b>(-4.60)</b> | <b>0.126</b><br><b>(0.68)</b> | <b>-0.154*</b><br><b>(-1.86)</b> | <b>-0.206**</b><br><b>(-2.19)</b> | <b>0.053</b><br><b>(0.42)</b> | <b>-2.239***</b><br><b>(-8.56)</b> | <b>-1.901***</b><br><b>(-7.94)</b> | <b>-0.438</b><br><b>(-1.21)</b> |
| N                       | 3,083                              | 3,144                              |                               | 2,721                            | 2,647                             |                               | 3,413                              | 3,342                              |                                 |
| Adj. R <sup>2</sup> (%) | 7.30                               | 5.97                               |                               | 3.38                             | 3.84                              |                               | 11.45                              | 5.87                               |                                 |

This table presents the regression results using standard errors clustered by firm. Changes in implied default probability (in %) are estimated based on changes in Z-Score (*Z-PROB*), O-Score (*O-PROB*), and the Black-Scholes-Merton model (*BSM-PROB*) between quarter  $q-1$  and quarter  $q+1$ , where quarter  $q$  is the quarter during which *OPI* is measured. The sample consists of 7,356 firm-quarter observations (1,037 distinct firms), with quarterly earnings announcement dates between January 1, 2009 and December 31, 2012. Industry and calendar quarter fixed effects as well as control variables are included but not reported for brevity. Models I, III, and V (Models II, IV, and VI) present results for high (low) Twitter activity. The high (low) Twitter activity subsample consists of 3,685 (3,671) firm-quarter observations, covering 685 (928) distinct firms, with earnings announcement dates between January 1, 2009 and December 31, 2012, and observations above (below) sample median number of tweets for each calendar quarter. t-statistics are in parentheses below coefficient estimates. For the variables of interest, coefficient estimates and t-statistics are bolded. \*\*\*, \*\*, \* represent statistical significance at  $p < 0.01$ ,  $p < 0.05$ , and  $p < 0.10$  (two-tailed), respectively. See Appendix A of the paper for variable definitions. To mitigate the influence of outliers, all continuous variables are winsorized at the 1<sup>st</sup> and 99<sup>th</sup> percentiles.

**TABLE OA13**  
**Twitter Opinion and Future Changes in Bond Yield Spreads –**  
**Sensitivity Tests with Control Variables**

$$\begin{aligned} \Delta YIELD_{[q-1;q+k]} = & \alpha + \beta_1 * OPI_{[-10;-3]} + \beta_2 * FE + \beta_3 * STOCKRET_{[-2;+2]} + \beta_4 * STOCKRET_{[-10;-3]} \\ & + \beta_5 * RP\_OPI_{[-10;-3]} + \beta_6 * LEV + \beta_7 * ROA + \beta_8 * SIZE + \beta_9 * MB + \beta_{10} * HORIZON \\ & + \beta_{11} * RATING + \beta_{12} * SPEC + \beta_{13} * SUBORD + \sum \delta_j * IND_j + \sum \delta_j * CALQTR_f + \varepsilon_{[q-1;q+k]} \end{aligned}$$

| Variable                            | $\Delta YIELD$              |                             |                             |                             |
|-------------------------------------|-----------------------------|-----------------------------|-----------------------------|-----------------------------|
|                                     | $[q-1;q+1]$                 |                             | $[q-1;q+3]$                 |                             |
|                                     | I                           | II                          | III                         | IV                          |
| <i>OPI</i>                          | <b>-0.133***</b><br>(-2.65) | <b>-0.130***</b><br>(-2.59) | <b>-0.294***</b><br>(-3.92) | <b>-0.285***</b><br>(-3.81) |
| <i>FE</i>                           | -0.157*<br>(-1.91)          | -0.146*<br>(-1.76)          | -0.157<br>(-1.48)           | -0.163<br>(-1.54)           |
| <i>STOCKRET</i> <sub>[-2;+2]</sub>  | -0.015<br>(-1.53)           | -0.015<br>(-1.50)           | 0.011<br>(0.94)             | 0.012<br>(0.98)             |
| <i>STOCKRET</i> <sub>[-10;-3]</sub> | 0.014<br>(1.28)             | 0.015<br>(1.30)             | -0.024<br>(-1.53)           | -0.023<br>(-1.44)           |
| <i>RP_OPI</i>                       | 0.226<br>(1.01)             | 0.243<br>(1.09)             | -0.157<br>(-0.48)           | -0.171<br>(-0.52)           |
| <i>LEV</i> <sub>q</sub>             | -1.469***<br>(-3.15)        | -0.443<br>(-0.63)           | -2.574***<br>(-3.54)        | -1.949<br>(-1.17)           |
| $\Delta LEV$ <sub>[q-k-1;q]</sub>   | 1.259<br>(1.47)             |                             | 2.098<br>(1.16)             |                             |
| <i>LEV</i> <sub>q-k-1</sub>         |                             | -0.978<br>(-1.32)           |                             | -0.503<br>(-0.31)           |
| <i>ROA</i> <sub>q</sub>             | 25.306***<br>(4.66)         | 4.216<br>(0.98)             | 6.772<br>(1.04)             | 0.381<br>(0.08)             |
| $\Delta ROA$ <sub>[q-k-1;q]</sub>   | -21.158***<br>(-5.20)       |                             | -6.774<br>(-1.64)           |                             |
| <i>ROA</i> <sub>q-k-1</sub>         |                             | 20.629***<br>(5.06)         |                             | 8.836<br>(2.14)             |
| <i>SIZE</i> <sub>q</sub>            | 0.228***<br>(3.04)          | -0.770***<br>(-3.23)        | 0.149<br>(1.31)             | 1.787***<br>(6.36)          |
| $\Delta SIZE$ <sub>[q-k-1;q]</sub>  | -0.972***<br>(-3.62)        |                             | 1.867***<br>(5.69)          |                             |
| <i>SIZE</i> <sub>q-k-1</sub>        |                             | 1.004***<br>(4.69)          |                             | -1.650***<br>(-6.36)        |
| <i>MB</i> <sub>q</sub>              | 0.043<br>(1.08)             | 0.061*<br>(1.73)            | 0.128*<br>(1.69)            | 0.045<br>(0.83)             |
| $\Delta MB$ <sub>[q-k-1;q]</sub>    | -0.020<br>(-0.21)           |                             | -0.263<br>(-1.64)           |                             |
| <i>MB</i> <sub>q-k-1</sub>          |                             | -0.028<br>(-0.61)           |                             | 0.093<br>(1.34)             |
| <i>HORIZON</i>                      | -0.001<br>(-0.44)           | -0.001<br>(-0.40)           | 0.001<br>(0.02)             | 0.001<br>(0.03)             |
| <i>RATING</i>                       | 0.168<br>(3.76)             | 0.169***<br>(3.66)          | 0.229***<br>(3.35)          | 0.231***<br>(3.15)          |
| <i>SPEC</i>                         | -0.137<br>(-0.59)           | -0.149<br>(-0.63)           | -0.362<br>(-0.90)           | -0.381<br>(-0.94)           |
| <i>SUBORD</i>                       | -0.079<br>(-0.44)           | -0.073<br>(-0.41)           | -0.116<br>(-0.45)           | -0.130<br>(-0.51)           |
| N                                   | 5,034                       | 5,034                       | 4,853                       | 4,853                       |
| Adj. R <sup>2</sup> (%)             | 6.31                        | 6.09                        | 9.56                        | 9.30                        |

### TABLE OA13 (cont'd)

This table presents the regression results using standard errors clustered by firm. The sample consists of 7,543 firm-quarter observations (1,044 distinct firms), with earnings announcement dates between January 1, 2009 and December 31, 2012. Industry and calendar quarter fixed effects are included but not reported for brevity. *t*-statistics are in parentheses below coefficient estimates. For the variables of interest, coefficient estimates and *t*-statistics are bolded. \*\*\*, \*\*, \* represent statistical significance at  $p < 0.01$ ,  $p < 0.05$ , and  $p < 0.10$  (two-tailed), respectively. See Appendix A of the paper for variable definitions. To mitigate the influence of outliers, all continuous variables are winsorized at the 1<sup>st</sup> and 99<sup>th</sup> percentiles.

**TABLE OA14**  
**Twitter Opinion and Future Changes in Implied Default Probability –**  
**Sensitivity Tests with Control Variables**

$$\Delta PROB_{[q-1;q+k]} = \alpha + \beta_1 * OPI\_BONDFUNDA_{[-10;-3]} + \beta_2 * OPI\_NONBONDFUNDA_{[-10;-3]} + \beta_3 * FE + \beta_4 * STOCKRET_{[-2;+2]} + \beta_5 * STOCKRET_{[-10;-3]} + \beta_6 * RP\_OPI_{[-10;-3]} + \beta_7 * LEV + \beta_8 * ROA + \beta_9 * SIZE + \beta_{10} * MB + \beta_{11} * HORIZON + \beta_{12} * RATING + \beta_{13} * SPEC + \beta_{14} * SUBORD + \sum \delta_j * IND_j + \sum \delta_f * CALQTR_f + \varepsilon_{[q-1;q+k]}$$

| Variable                            | $\Delta Z-PROB$             |                             | $\Delta O-PROB$             |                             | $\Delta BSM-PROB$            |                             |
|-------------------------------------|-----------------------------|-----------------------------|-----------------------------|-----------------------------|------------------------------|-----------------------------|
|                                     | $[q-1;q+1]$                 | $[q-1;q+3]$                 | $[q-1;q+1]$                 | $[q-1;q+3]$                 | $[q-1;q+1]$                  | $[q-1;q+3]$                 |
|                                     | I                           | II                          | III                         | IV                          | V                            | VI                          |
| <i>OPI</i>                          | <b>-0.460***</b><br>(-5.35) | <b>-0.962***</b><br>(-8.17) | <b>-0.179***</b><br>(-2.94) | <b>-0.317***</b><br>(-4.93) | <b>-1.744***</b><br>(-10.25) | <b>-2.858***</b><br>(-9.98) |
| <i>FE</i>                           | -0.384**<br>(-2.48)         | -0.345*<br>(-1.91)          | -0.219<br>(-1.37)           | -0.191<br>(-1.24)           | -1.022***<br>(-2.62)         | -1.046*<br>(-1.95)          |
| <i>STOCKRET</i> <sub>[-2;+2]</sub>  | -0.094***<br>(-5.33)        | -0.089***<br>(-4.40)        | -0.032**<br>(-2.50)         | -0.026*<br>(-1.94)          | -0.153***<br>(-3.88)         | -0.119**<br>(-2.41)         |
| <i>STOCKRET</i> <sub>[-10;-3]</sub> | -0.061**<br>(-2.41)         | -0.060**<br>(-2.15)         | 0.014<br>(0.73)             | -0.011<br>(-0.57)           | -0.085*<br>(-1.90)           | -0.077<br>(-1.31)           |
| <i>RP_OPI</i>                       | -0.256<br>(-0.44)           | 0.702<br>(0.97)             | -0.112<br>(-0.27)           | 0.009<br>(0.02)             | 1.333<br>(1.41)              | 2.732**<br>(1.98)           |
| <i>LEV</i>                          | -1.687**<br>(-2.14)         | -3.218**<br>(-2.56)         | -0.202<br>(-0.34)           | 0.040<br>(0.06)             | -5.747***<br>(-3.34)         | -10.994***<br>(-4.30)       |
| $\Delta LEV$ <sub>[q-k-1;q]</sub>   | 1.317<br>(0.60)             | -4.570<br>(-1.23)           | -4.716*<br>(-1.66)          | -4.027**<br>(-2.03)         | 5.069*<br>(1.72)             | -0.335<br>(-0.05)           |
| <i>ROA</i>                          | -7.761<br>(-0.68)           | -12.422<br>(-0.74)          | -14.245**<br>(-2.23)        | -7.984<br>(-1.25)           | 100.639***<br>(6.25)         | 56.215**<br>(2.30)          |
| $\Delta ROA$ <sub>[q-k-1;q]</sub>   | -31.298***<br>(-3.50)       | -8.134<br>(-0.78)           | 0.877<br>(0.18)             | 3.980<br>(0.92)             | -83.512<br>(-6.56)           | -59.963***<br>(-3.29)       |
| <i>SIZE</i>                         | 0.243**<br>(2.25)           | 0.047<br>(0.28)             | 0.181**<br>(2.27)           | 0.154*<br>(1.78)            | 0.845***<br>(4.17)           | 0.592*<br>(1.84)            |
| $\Delta SIZE$ <sub>[q-k-1;q]</sub>  | -1.996***<br>(-3.91)        | 0.321<br>(0.74)             | -0.151<br>(-0.42)           | 0.215<br>(0.72)             | -12.979***<br>(-13.44)       | 9.144<br>(9.63)             |
| <i>MB</i>                           | -0.039<br>(-0.91)           | 0.052<br>(0.90)             | -0.103***<br>(-3.24)        | -0.101***<br>(-2.66)        | 0.094<br>(1.11)              | 0.205*<br>(1.71)            |
| $\Delta MB$ <sub>[q-k-1;q]</sub>    | -0.530***<br>(-4.34)        | -0.419<br>(-3.13)           | -0.291<br>(-2.64)           | -0.152*<br>(-1.69)          | 0.036<br>(0.19)              | -0.630**<br>(-2.54)         |
| <i>HORIZON</i>                      | -0.001<br>(-0.89)           | 0.001<br>(0.01)             | -0.001<br>(-1.34)           | -0.001<br>(-2.38)           | 0.001<br>(0.16)              | 0.001<br>(0.55)             |
| <i>RATING</i>                       | 0.100**<br>(2.53)           | 0.079<br>(1.18)             | 0.028<br>(1.16)             | 0.041<br>(1.43)             | 0.306***<br>(4.49)           | 0.273**<br>(2.35)           |
| <i>SPEC</i>                         | 0.177<br>(0.58)             | 0.368<br>(0.82)             | 0.086<br>(0.52)             | -0.055<br>(-0.30)           | 0.311<br>(0.53)              | -0.273<br>(-0.27)           |
| <i>SUBORD</i>                       | -0.047<br>(-0.15)           | -0.197<br>(-0.38)           | -0.041<br>(-0.19)           | -0.173<br>(-0.65)           | -0.989*<br>(-1.79)           | -1.768*<br>(-1.81)          |
| N                                   | 5,750                       | 5,592                       | 5,229                       | 5,106                       | 6,260                        | 6,216                       |
| Adj. R <sup>2</sup> (%)             | 9.76                        | 7.78                        | 4.89                        | 3.71                        | 18.80                        | 12.86                       |

This table presents the regression results using standard errors clustered by firm. Changes in implied default probability (in %) are estimated based on changes in Z-Score (*Z-PROB*), O-Score (*O-PROB*), and the Black-Scholes-Merton model (*BSM-PROB*) between quarter *q-1* and either quarter *q+1* or quarter *q+3*, where quarter *q* is the quarter during which *OPI* is measured. The sample consists of 7,543 firm-quarter observations (1,044 distinct firms), with quarterly earnings announcement dates between January 1, 2009 and December 31, 2012. Industry and calendar quarter fixed effects are included but not reported for brevity. *t*-statistics are in parentheses below coefficient estimates. For the variables of interest, coefficient estimates and *t*-statistics are bolded. \*\*\*, \*\*, \* represent statistical significance at  $p < 0.01$ ,  $p < 0.05$ , and  $p < 0.10$  (two-tailed), respectively. See Appendix A of the paper for variable definitions. To mitigate the influence of outliers, all continuous variables are winsorized at the 1<sup>st</sup> and 99<sup>th</sup> percentiles.

**TABLE OA15**  
**Twitter Opinion and Future Changes in Implied Default Probability –**  
**Sensitivity Tests with Control Variables (Cont'd)**

$$\Delta PROB_{[q-1;q+k]} = \alpha + \beta_1 * OPI\_BONDFUNDA_{[-10;-3]} + \beta_2 * OPI\_NONBONDFUNDA_{[-10;-3]} + \beta_3 * FE + \beta_4 * STOCKRET_{[-2;+2]} + \beta_5 * STOCKRET_{[-10;-3]} + \beta_6 * RP\_OPI_{[-10;-3]} + \beta_7 * LEV + \beta_8 * ROA + \beta_9 * SIZE + \beta_{10} * MB + \beta_{11} * HORIZON + \beta_{12} * RATING + \beta_{13} * SPEC + \beta_{14} * SUBORD + \sum \delta_j * IND_j + \sum \delta_f * CALQTR_f + \varepsilon_{[q-1;q+k]}$$

| Variable                            | $\Delta Z-PROB$             |                             | $\Delta O-PROB$             |                             | $\Delta BSM-PROB$            |                             |
|-------------------------------------|-----------------------------|-----------------------------|-----------------------------|-----------------------------|------------------------------|-----------------------------|
|                                     | $[q-1;q+1]$                 | $[q-1;q+3]$                 | $[q-1;q+1]$                 | $[q-1;q+3]$                 | $[q-1;q+1]$                  | $[q-1;q+3]$                 |
|                                     | I                           | II                          | III                         | IV                          | V                            | VI                          |
| <i>OPI</i>                          | <b>-0.452***</b><br>(-5.25) | <b>-0.950***</b><br>(-8.06) | <b>-0.174***</b><br>(-2.83) | <b>-0.318***</b><br>(-4.97) | <b>-1.735***</b><br>(-10.08) | <b>-2.825***</b><br>(-9.93) |
| <i>FE</i>                           | -0.373***<br>(-2.41)        | -0.349*<br>(-1.93)          | -0.225<br>(-1.40)           | -0.192<br>(-1.25)           | -0.958**<br>(-2.44)          | -1.052*<br>(-1.93)          |
| <i>STOCKRET</i> <sub>[-2;+2]</sub>  | -0.093***<br>(-5.24)        | -0.087***<br>(-4.28)        | -0.030**<br>(-2.35)         | -0.025*<br>(-1.87)          | -0.150***<br>(-3.83)         | -0.121**<br>(-2.46)         |
| <i>STOCKRET</i> <sub>[-10;-3]</sub> | -0.061**<br>(-2.38)         | -0.059**<br>(-2.12)         | 0.014<br>(0.74)             | -0.011<br>(-0.57)           | -0.088*<br>(-1.94)           | -0.073<br>(-1.24)           |
| <i>RP_OPI</i>                       | -0.230<br>(-0.39)           | 0.680<br>(0.95)             | -0.102<br>(-0.25)           | 0.014<br>(0.03)             | 1.365<br>(1.44)              | 2.636*<br>(1.91)            |
| <i>LEV</i>                          | -0.726<br>(-0.38)           | -5.525*<br>(-1.73)          | -3.732<br>(-1.30)           | -3.089*<br>(-1.67)          | -0.654<br>(-0.23)            | -9.177<br>(-1.46)           |
| <i>LEV</i> <sub>q-k-1</sub>         | -0.998<br>(-0.53)           | 1.946<br>(0.56)             | 3.353<br>(1.22)             | 3.051<br>(1.54)             | -5.139*<br>(-1.87)           | -2.275<br>(-0.32)           |
| <i>ROA</i>                          | -38.494***<br>(-3.98)       | -20.839<br>(-1.61)          | -13.956*<br>(-1.89)         | -4.693<br>(-0.71)           | 12.687<br>(0.93)             | 2.597<br>(0.13)             |
| <i>ROA</i> <sub>q-k-1</sub>         | 34.488***<br>(3.78)         | 11.090<br>(1.12)            | 1.531<br>(0.25)             | -3.338<br>(-0.73)           | 92.387***<br>(6.84)          | 60.041***<br>(3.53)         |
| <i>SIZE</i>                         | -1.955<br>(-3.89)           | 0.381<br>(0.87)             | 0.074<br>(0.19)             | 0.429<br>(1.41)             | -11.602***<br>(-12.78)       | 8.965***<br>(9.42)          |
| <i>SIZE</i> <sub>q-k-1</sub>        | 2.160***<br>(4.28)          | -0.379<br>(-0.87)           | 0.063<br>(0.16)             | -0.296<br>(-0.99)           | 12.457***<br>(13.72)         | -8.392***<br>(-9.11)        |
| <i>MB</i>                           | -0.254***<br>(-2.99)        | -0.184*<br>(-1.94)          | -0.270***<br>(-3.33)        | -0.209***<br>(-2.97)        | 0.106<br>(0.63)              | -0.012<br>(-0.07)           |
| <i>MB</i> <sub>q-k-1</sub>          | 0.287***<br>(3.16)          | 0.314***<br>(2.99)          | 0.229**<br>(2.42)           | 0.145**<br>(2.06)           | -0.019<br>(-0.11)            | 0.256<br>(1.21)             |
| <i>HORIZON</i>                      | -0.001<br>(-0.78)           | 0.001<br>(0.01)             | -0.001<br>(-1.23)           | -0.001<br>(-2.37)           | 0.001<br>(0.12)              | 0.001<br>(0.53)             |
| <i>RATING</i>                       | 0.104***<br>(2.61)          | 0.080<br>(1.21)             | 0.026<br>(1.11)             | 0.041<br>(1.42)             | 0.324<br>(4.74)              | 0.289**<br>(2.50)           |
| <i>SPEC</i>                         | 0.143<br>(0.47)             | 0.392<br>(0.87)             | 0.093<br>(0.57)             | -0.056<br>(-0.31)           | 0.211<br>(0.36)              | -0.224<br>(-0.23)           |
| <i>SUBORD</i>                       | -0.019<br>(-0.06)           | -0.180<br>(-0.35)           | -0.051<br>(-0.24)           | -0.180<br>(-0.67)           | -0.890<br>(-1.62)            | -1.750*<br>(-1.79)          |
| N                                   | 5,750                       | 5,592                       | 5,229                       | 5,106                       | 6,260                        | 6,216                       |
| Adj. R <sup>2</sup> (%)             | 9.23                        | 7.51                        | 4.69                        | 3.72                        | 19.21                        | 12.66                       |

This table presents the regression results using standard errors clustered by firm. Changes in implied default probability (in %) are estimated based on changes in Z-Score (*Z-PROB*), O-Score (*O-PROB*), and the Black-Scholes-Merton model (*BSM-PROB*) between quarter *q-1* and either quarter *q+1* or quarter *q+3*, where quarter *q* is the quarter during which *OPI* is measured. The sample consists of 7,543 firm-quarter observations (1,044 distinct firms), with quarterly earnings announcement dates between January 1, 2009 and December 31, 2012. Industry and calendar quarter fixed effects are included but not reported for brevity. *t*-statistics are in parentheses below coefficient estimates. For the variables of interest, coefficient estimates and *t*-statistics are bolded. \*\*\*, \*\*, \* represent statistical significance at  $p < 0.01$ ,  $p < 0.05$ , and  $p < 0.10$  (two-tailed), respectively. See Appendix A of the paper for variable definitions. To mitigate the influence of outliers, all continuous variables are winsorized at the 1<sup>st</sup> and 99<sup>th</sup> percentiles.
